# Supplementary material
Source: publisher figshare collection journal article supplement (https://sage.figshare.com/ndownloader/files/21384654)
Supplement: Supplementary file 1 [file 21384654]

## **ONLINE SUPPLEMENT:**

### **Confusingly similar: Discerning between Hardware Guitar Amplifier**

#### **Sounds and Simulations with the *Kemper Profiling Amp***

| <b>Content:</b>                                                                 | <b>Page</b> |
|---------------------------------------------------------------------------------|-------------|
| A. Detailed list of the hardware used                                           | 2           |
| B. Exact wording of questions and possible answers about the musical background | 6           |
| C. Supplementary figures                                                        | 7           |
| D. Supplementary tables                                                         | 14          |
| E. Endnote                                                                      | 26          |
| F. References                                                                   | 27          |

## **A. Detailed list of the hardware used**

### **a) Marshall Amplifier for Stimuli 1-4**

- (original vintage) 1962 Fender Stratocaster (Candy Apple Red)
  - Pickup selection (volume and tone controls always turned to maximum): neck pickup for Stimuli 1-4
- (original vintage) 1968 Marshall JMP "Super Lead" 100 Watt amplifier
- Two Marshall cabinets (original vintage):
  - Cabinet 1: Marshall 100-watt speaker, mid 1960s "Pin Stripe" with 4 x Celestion "Green Back" G12M speakers, cabinet cloth removed
  - Cabinet 2: Marshall 100-watt speaker, 1970 "Basketweave" cloth with 4 x Celestion "Green Back" G12M speakers
- Microphones (close miking distances measured from front of microphone):
  - Electro-Voice RE 20 (cabinet cloth removed; distance to speaker-cloth level: 3 cm, off-center distance from speaker-cone center to side: 6 cm).
  - Neumann U89i (directionality: hyper-cardioid; distance to speaker-cloth: 5 cm; off-center distance from speaker-cone center to side: 3 cm, measured from middle of diaphragm (middle-bar of grill).
  - Royer R121 (with cabinet cloth; angled to avoid damage of ribbon; distance speaker cloth: 5 cm; off-center distance from speaker-cone center to side: 3 cm; measured from ribbon [middle of magnets]).
  - Sennheiser MD441 (cabinet cloth removed; distance to speaker-cloth-level: 3.6 cm; off-center distance from speaker-cone center to side: 3.5 cm).
- Microphone types and positions for the recording and profiling of the Marshall cabinet. Upper left and right: Sennheiser MD 441 (left), Electrovoice RE 20 (right); lower left: Neumann U89i; lower right: Royer R121 (the Sennheiser MD 421 and Shure SM 57 were not used).

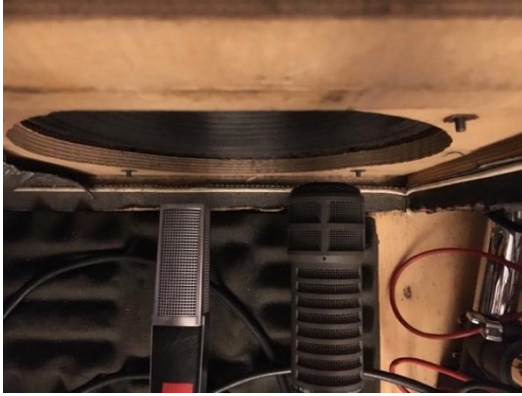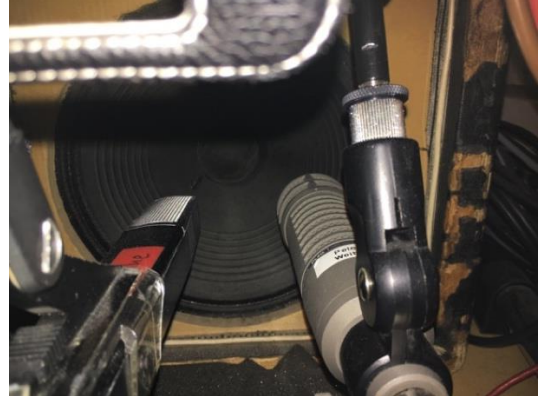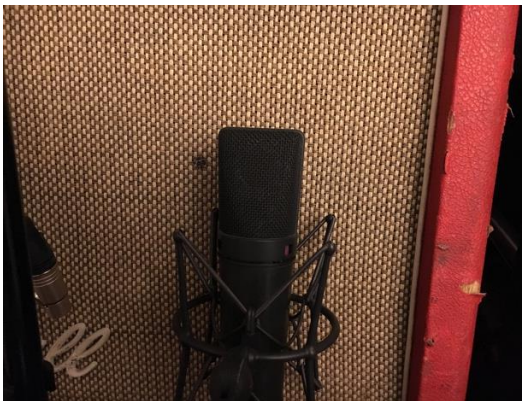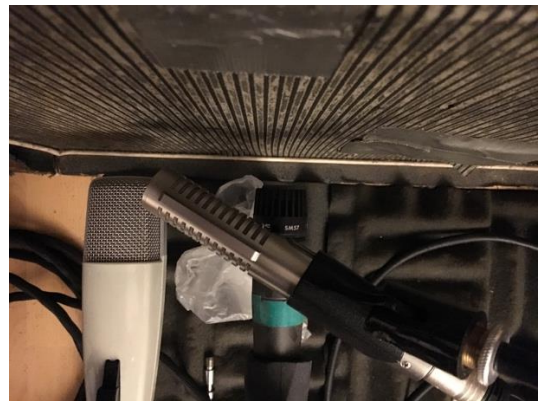

- Microphone preamplifier: 2 x Siemens V72s, 2 x Telefunken V72 (original vintage)
- The output signals of the microphone preamplifiers were mixed using a “TBG”-mixing console of the 610 series (custom-built for Bayerischer Rundfunk in 1991) with a summation amplifier by Manfred Reckmeyer.
- The output signal of the mixing console was converted using a Lavry Gold "AD 122-96 MKII" analogue-to-digital converter and recorded in Pro Tools HD.

## **b) Vox Amplifier for Stimuli 5-12**

- (original vintage) 1953 Fender Telecaster (Blackguard)
  - Pickup selection/combinations: bridge pickup for Stimuli 5-12
- (original vintage) Vox AC 30, constructed in the mid-1970s, tuning by Manfred Reckmeyer
- Two Vox AC 30 cabinets without amplifier section:
  - Cabinet 1: (original vintage) 1970s with Celestion G12M (cabinet cloth removed)
  - Cabinet 2: (original vintage) 1960s with Grey Bulldog Alnico speakers
- Microphones (close miking distances measured from front of microphone):
  - Neumann U87i (directionality: cardioid; cabinet cloth removed; distance to speaker-cloth level: 6 cm; off-center distance from speaker-cone center to side: 5.5 cm, measured from middle of diaphragm [middle-bar of grill]).
  - Royer R121 (distance to speaker-cloth level: 6 cm; off-center distance above speaker cone: 5.5 cm; angled to avoid damage of ribbon, measured from ribbon/middle of magnets).
  - Sennheiser MD441 (cabinet cloth removed; distance to speaker-cloth level: 3.6 cm; off-center distance from speakercone center to side: 3.5 cm)
- Microphone types and positions for the recording and profiling of the Vox AC 30 cabinet. Upper left and right: Mid 70s Vox Cabinet with Celestion G12M, Sennheiser MD 441 (left), Neumann U87i (right); lower left and right: 60s Vox cabinet with Bulldog Speakers, Royer R121 (the Sennheiser MD 421 and Shure SM 57 were not used).

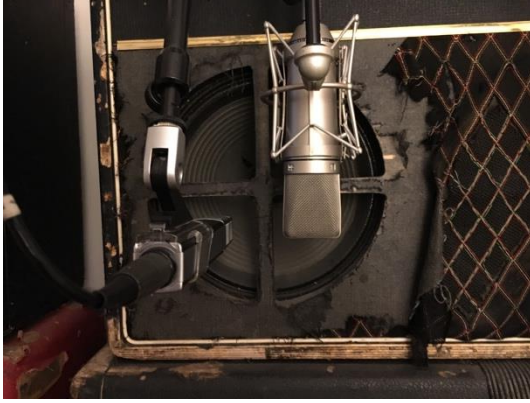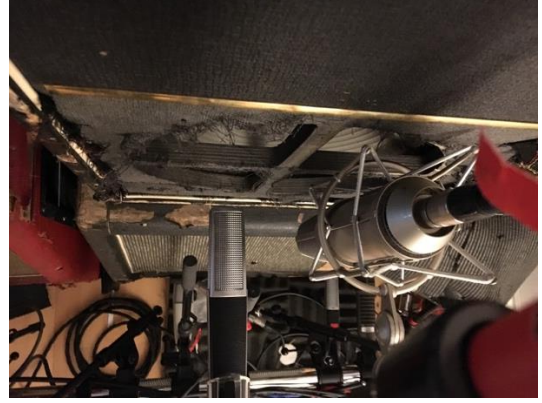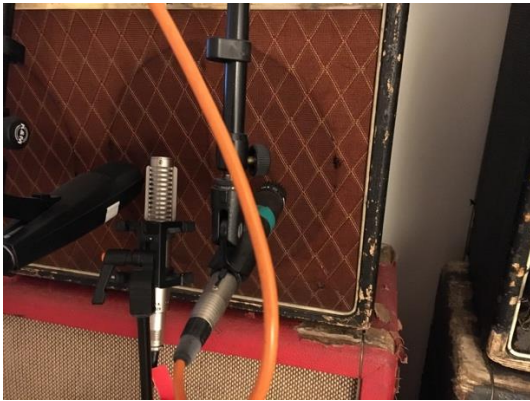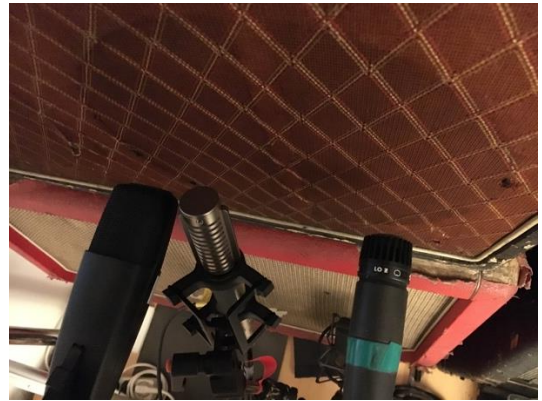

- Microphone preamplifier: 2 x API 512, Siemens V72s, (original vintage)
- The output signals of the microphone preamplifiers were mixed using a “TBG”-mixing console of the 610 series (custom-built for Bayerischer Rundfunk in 1991) with a summation amplifier by Manfred Reckmeyer.
- The output signal of the mixing console was converted using a Lavry Gold "AD 122-96 MKII" analogue-to-digital converter and recorded in Pro Tools HD.

## **B. Exact wording of questions and possible answers about the musical background**

**Musical profession:** I am (or I am going to be)...

- a professional musician
- a hobby musician
- a teacher at a music school
- a music producer
- other: \_\_\_\_\_ (to be filled out)
- I am not a musician

**Electric guitar expertise:** Do you play the electric guitar?

- No
- Yes, I am an amateur musician
- Yes, I am a semi-professional guitarist
- Yes, I am a professional guitarist

**Knowledge of the KPA:** Did you know about the KPA before participating in this study?

- No
- Yes, but I have not worked with it yet
- Yes, I have even used it before myself

### C. Supplementary figures

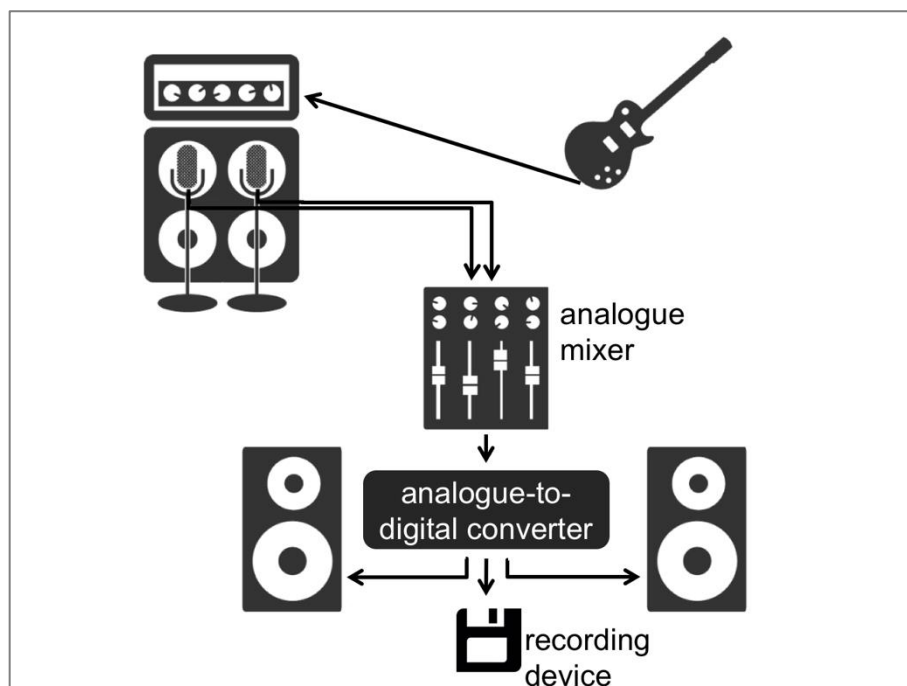

Figure S1: Setup for the recording of the OA stimuli

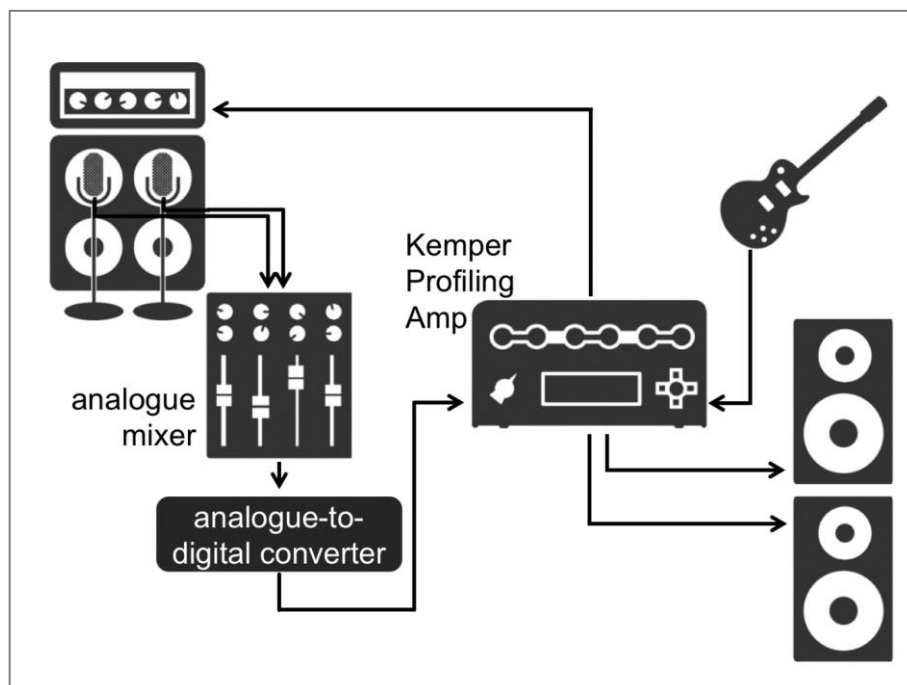

Figure S2: Setup for the profiling process

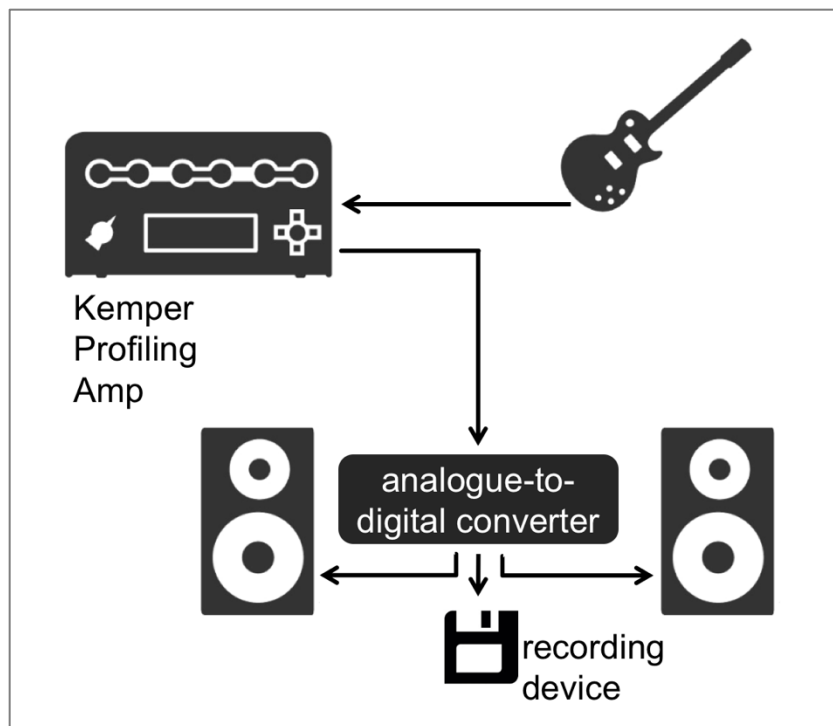

Figure S3: Setup for the recording of the KPA stimuli

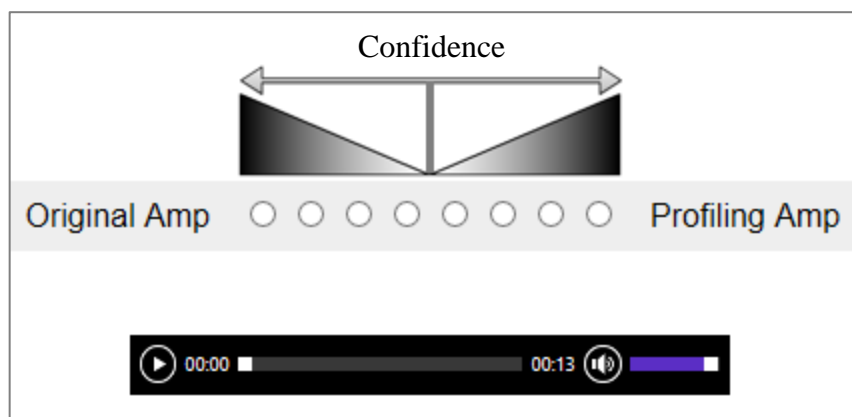

Figure S4: Response screen with audio control button and rating scale for the assignment of the audio examples to one of the two recording conditions (OA vs. KPA).

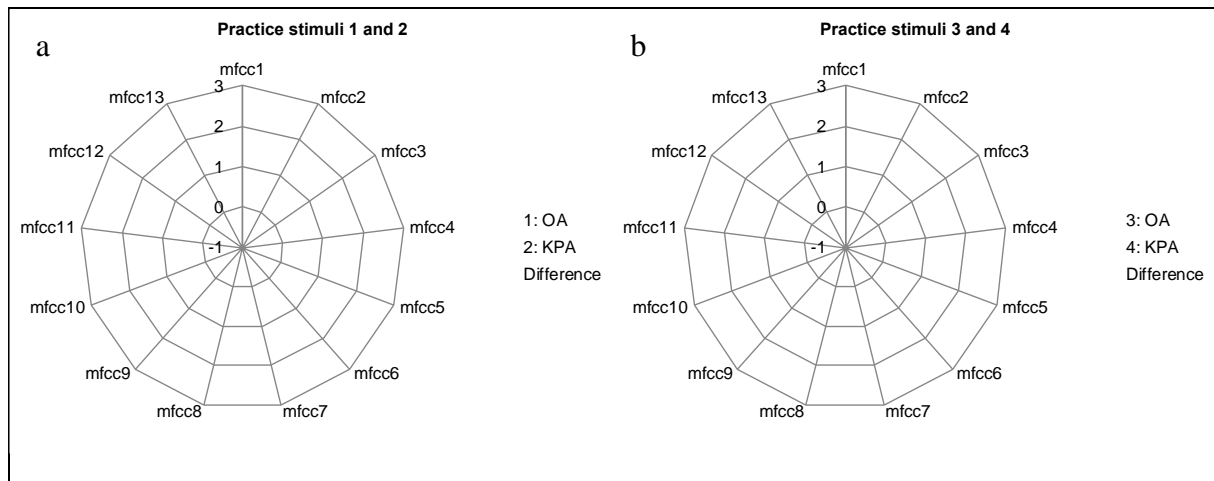

Figure S5 a and b: Radar plots of MFCC values for the 4 practice stimuli. The MFCCs of a pair of stimuli are displayed in one diagram along with the difference between each MFCC for the two stimuli.

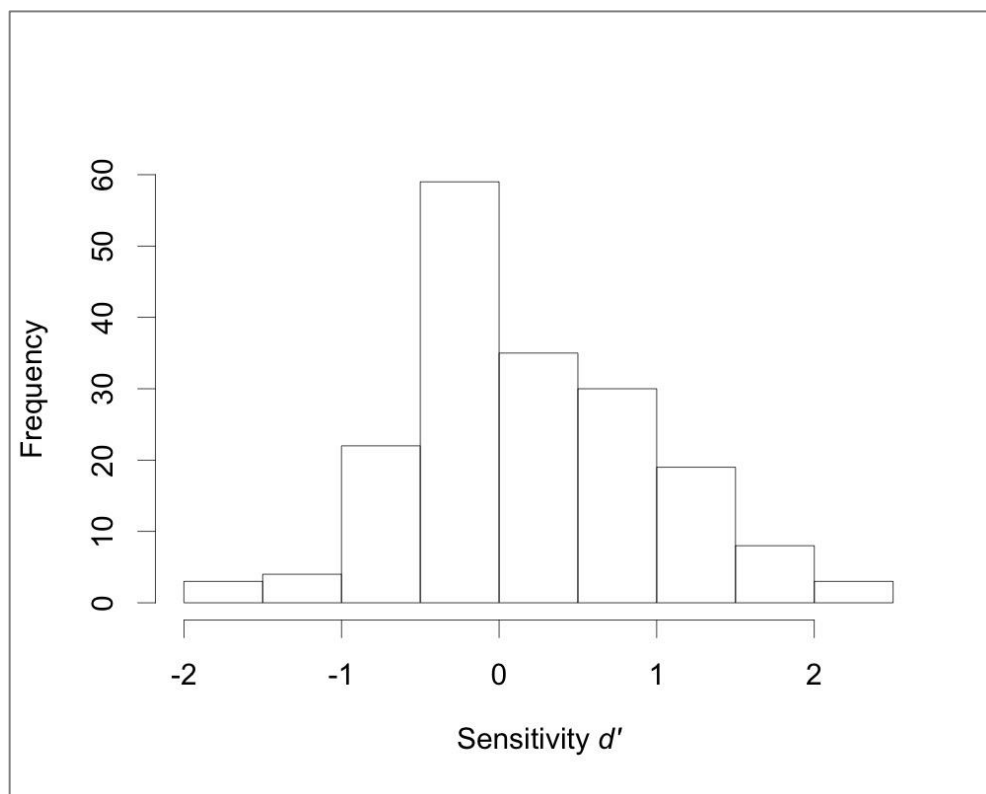

Figure S6: Sensitivity distribution of all  $N = 183$  participants

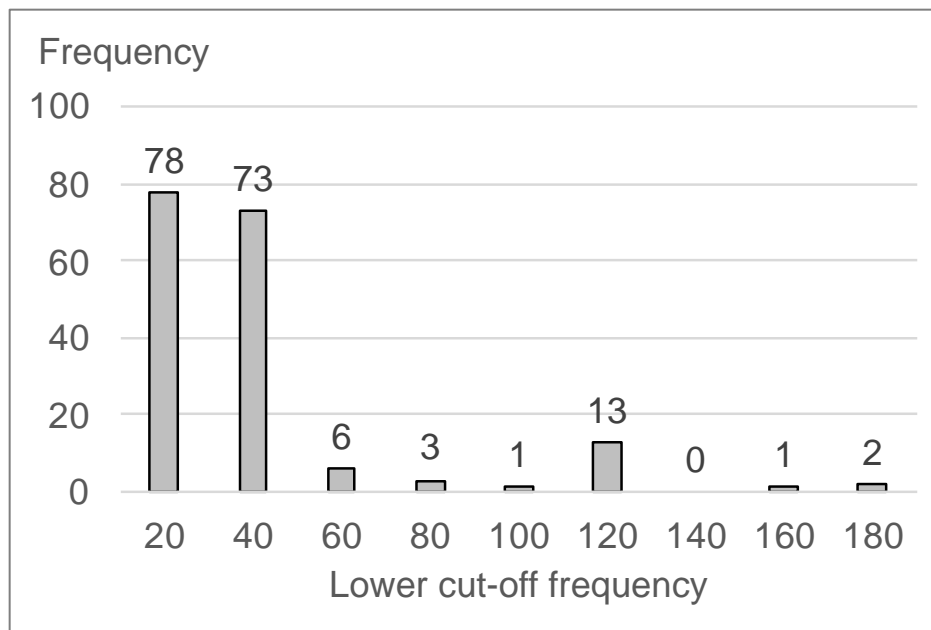

Figure S7: Lower cut-off frequency of the playback devices used by the participants

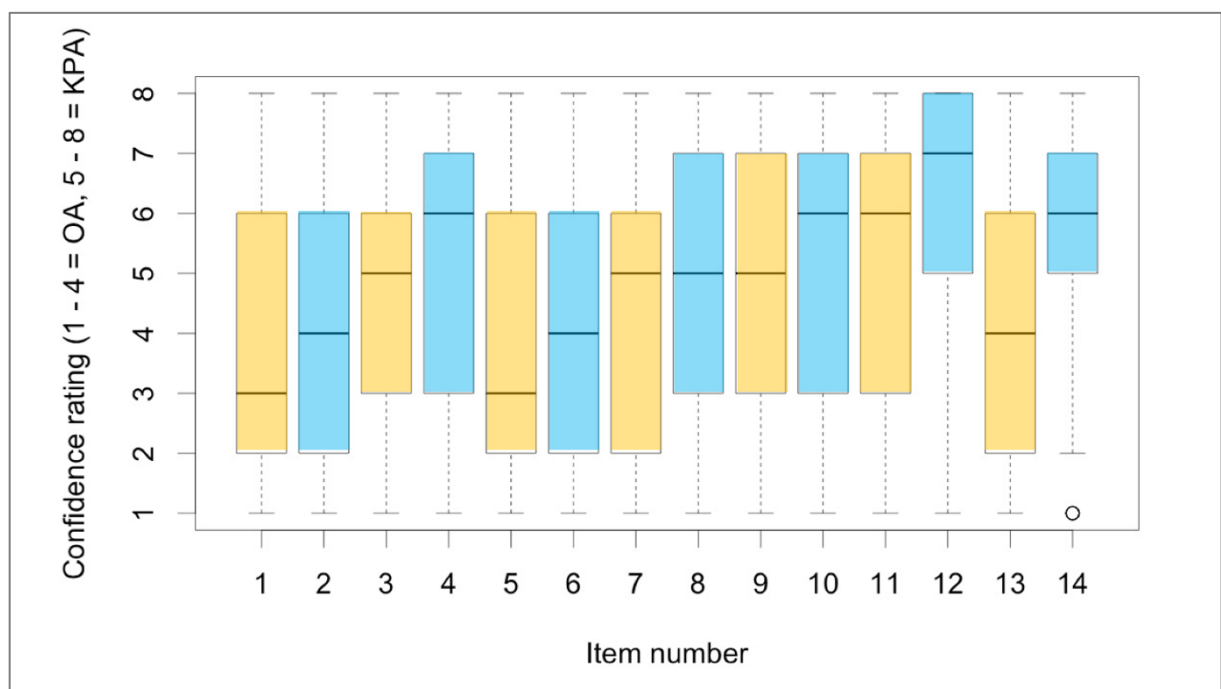

Figure S8: Participants' ratings of all 14 stimuli. OA stimuli = orange, KPA = blue. Number 13 is retest of Number 9, and Number 14 is retest of Number 12.

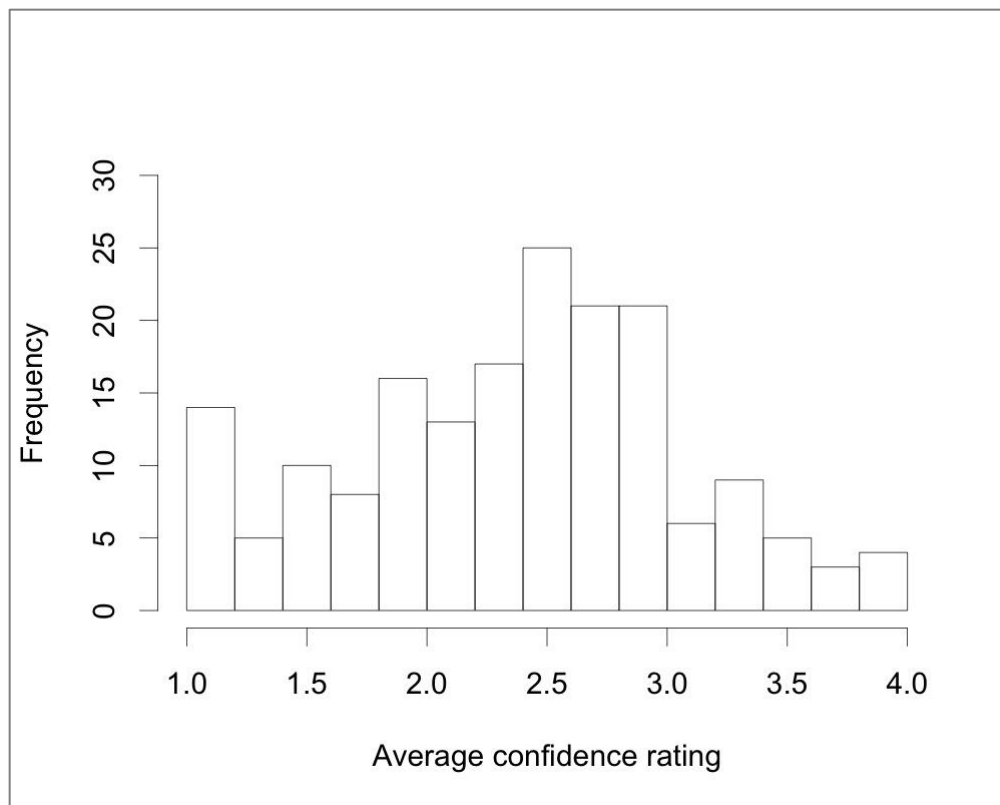

Figure S9: Mean confidence rating of the 177 participants averaged over the 12 stimuli (1 = maximum confidence in the classification task, 4 = minimum confidence)

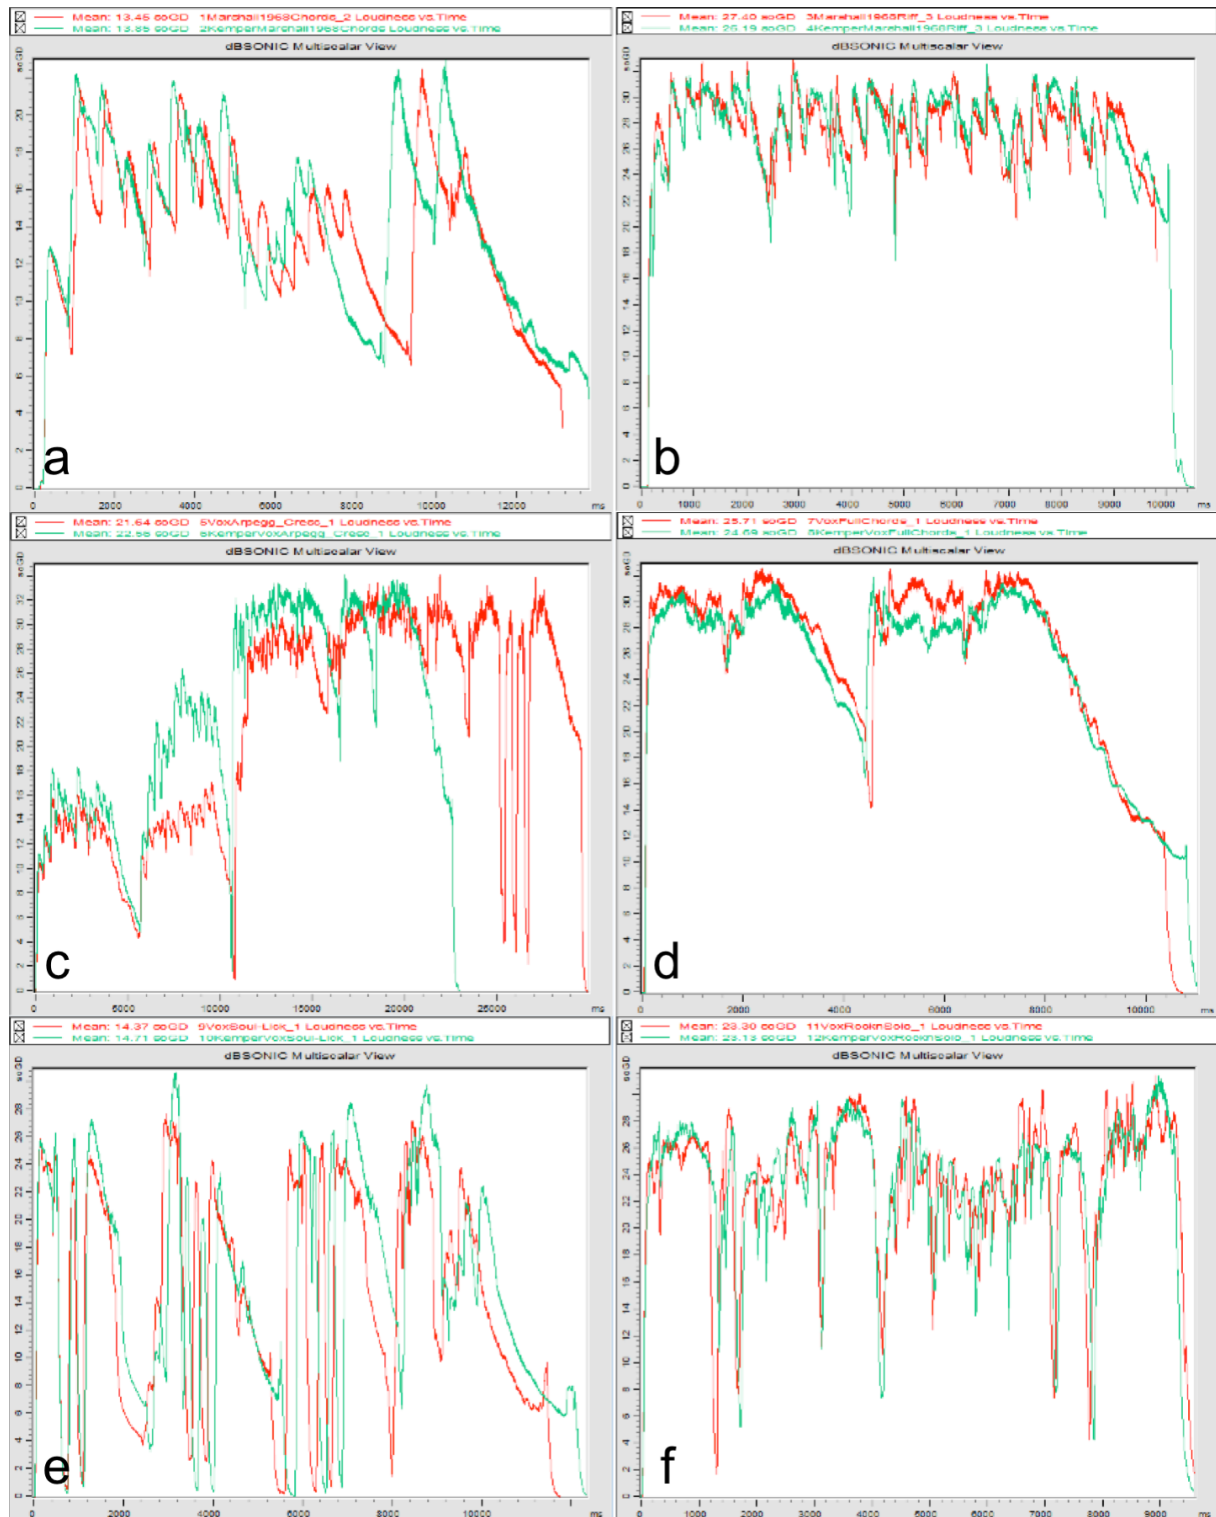

Figure S10 a-f: Comparison of loudness times series for the two versions of each stimulus (a: stimuli 1 and 2, ..., f: stimuli 11 and 12). KPA = green line, OA = red line. Analysis by means of the software dBSONIC ("dBSONIC" 2012) with the following settings: loudness (sone), according to DIN 45631, sound field: diffuse, time interval: 2 ms. For a comment on deviating lengths of signals in Figure C, see endnote.<sup>1</sup>

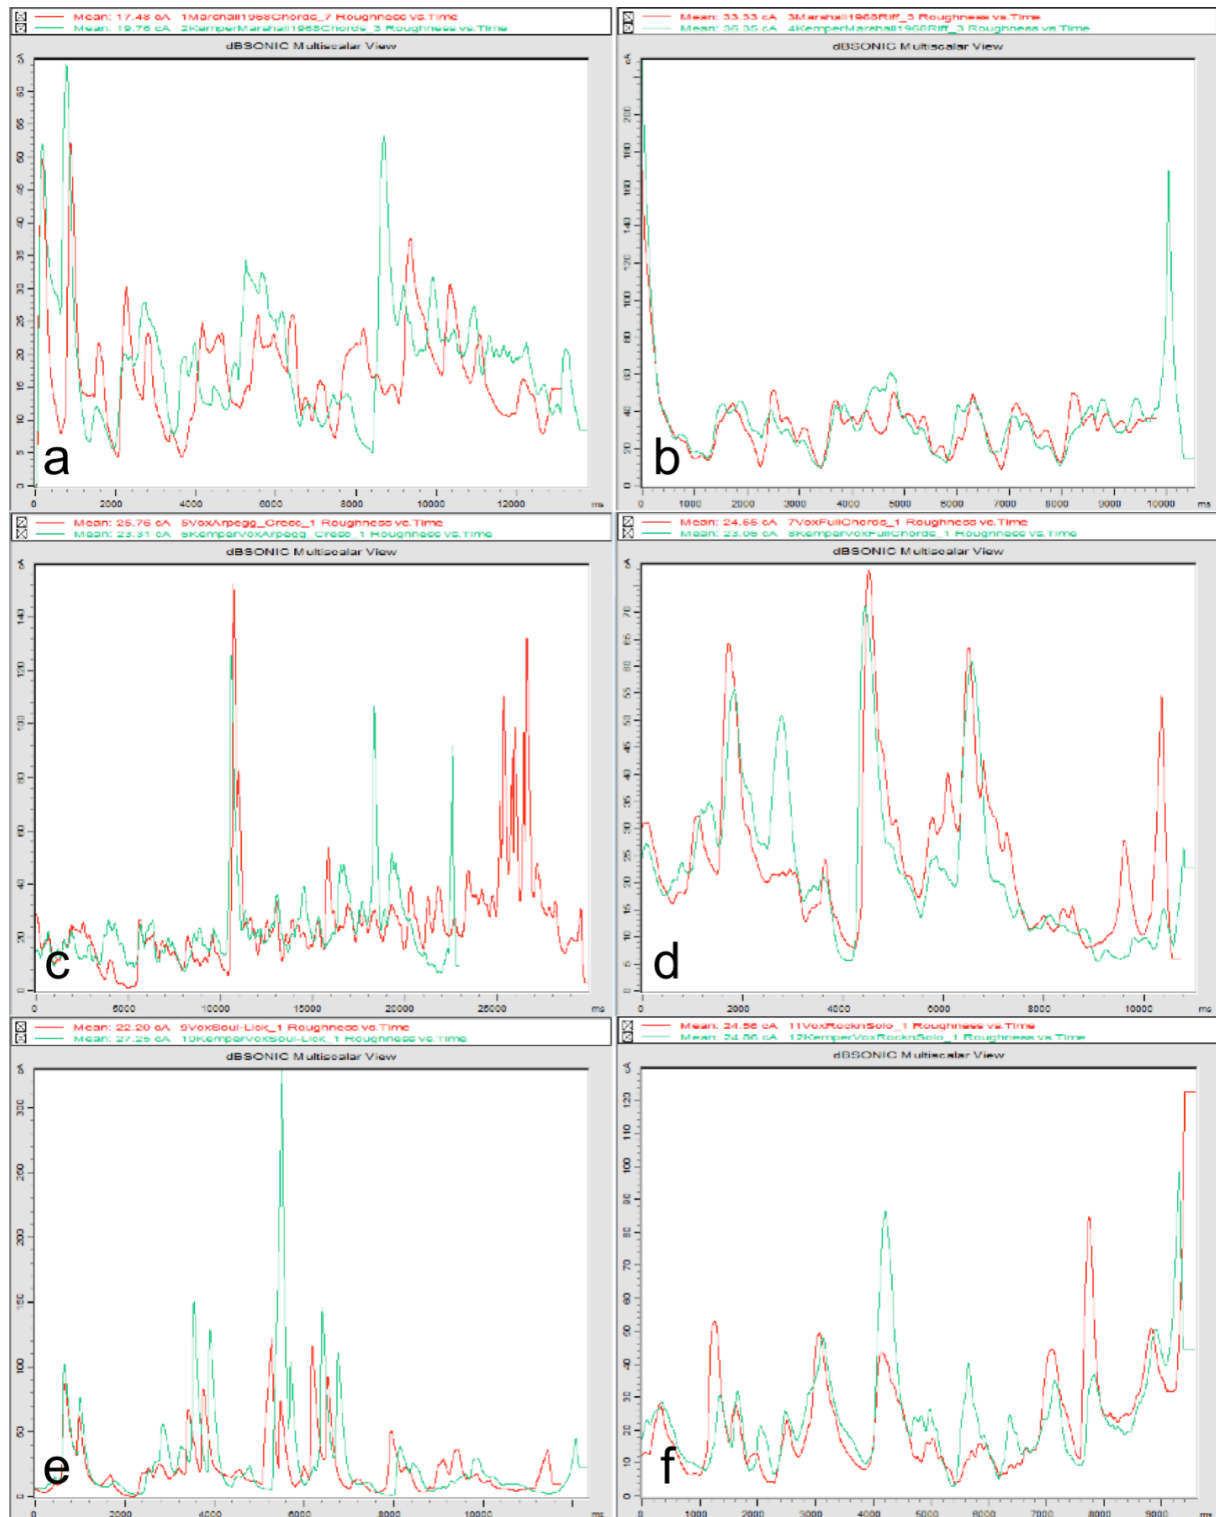

Figure S11 a-f: Comparison of roughness times series for the two versions of each stimulus (a: Stimuli 1 and 2, ..., f: Stimuli 11 and 12). KPA = green line, OA = red line. Analysis by means of the software dBSONIC ("dBSONIC" 2012) with the following settings: roughness (centi Asper [cA]); time interval: 2 ms; sequence length: 200 ms. For a comment on deviating lengths of signals in Figure C, see endnote.<sup>1</sup>

## D. Supplementary tables

Table S1: Descriptive data of the control variables electric guitar expertise, knowledge of the KPA, and musical profession

|                                                                                              | <i>n</i> | %    |
|----------------------------------------------------------------------------------------------|----------|------|
| <b>Electric guitar expertise</b> (Do you play the electric guitar?)                          |          |      |
| No                                                                                           | 19       | 10.7 |
| Yes, I am an amateur.                                                                        | 50       | 28.2 |
| Yes, I am a semi-professional guitarist.                                                     | 60       | 33.9 |
| Yes, I am a professional guitarist.                                                          | 48       | 27.1 |
| <b>Knowledge of the KPA</b> (Did you know about the KPA before participating in this study?) |          |      |
| No                                                                                           | 18       | 10.2 |
| Yes, but I have not worked with it yet.                                                      | 69       | 39.0 |
| Yes, I have used it myself.                                                                  | 90       | 50.8 |
| <b>Musical profession</b> (I am [or I am going to be] ...)                                   |          |      |
| Not a musician                                                                               | 6        | 3.4  |
| Hobby musician                                                                               | 65       | 36.7 |
| Professional musician                                                                        | 22       | 12.4 |
| Music producer                                                                               | 24       | 13.6 |
| Teacher at a music school                                                                    | 16       | 9.0  |
| Other musician                                                                               | 44       | 24.9 |

Table S2: Scores for musical sophistication of the sample as measured by the Gold-MSI; range = lowest and highest possible scores to achieve; last column: lower quartile, median and upper quartile of the norm sample (Schaal, Bauer, & Müllensiefen, 2014, p. 445).

| <b>Gold-MSI</b>                   | <i>M</i> | <i>SD</i> | <i>Median</i> | <i>Min.</i> | <i>Max.</i> | <b>Range</b> | <b>Quartiles of<br/>norm sample</b> |
|-----------------------------------|----------|-----------|---------------|-------------|-------------|--------------|-------------------------------------|
| General Factor                    | 98.9     | 12.8      | 101           | 53          | 124         | [18;<br>126] | 56; 70; 85                          |
| Factor 1: Active<br>Engagement    | 43.2     | 6.7       | 44            | 21          | 58          | [9; 63]      | 26, 33, 40                          |
| Factor 2: Perceptual<br>Abilities | 56.5     | 4.9       | 57            | 36          | 63          | [9; 63]      | 40, 46, 52                          |
| Factor 3: Musical Training        | 36.7     | 7.4       | 38            | 13          | 48          | [7; 49]      | 14, 22, 31                          |

Table S3: Proportion of monophonic and stereophonic playback

| <b>Mode of playback</b>         | <i>n</i> | %    |
|---------------------------------|----------|------|
| stereophonic (correct polarity) | 148      | 83.6 |
| stereophonic (twisted channels) | 15       | 8.5  |
| monophonic                      | 5        | 2.8  |
| wrong answer                    | 9        | 5.1  |

Table S4: Coding the four answering possibilities as hits, misses, false alarms and correct rejections according to Signal Detection Theory

|                                        | Participant allocates the stimulus<br>to the OA-condition | Participant allocates the stimulus<br>to the KPA-condition |
|----------------------------------------|-----------------------------------------------------------|------------------------------------------------------------|
| Stimulus was recorded using the<br>OA  | Hit                                                       | Miss (false negative)                                      |
| Stimulus was recorded using the<br>KPA | False alarm (FA, false positive)                          | Correct rejection (CR)                                     |

Table S5. Proportion of correct responses among all  $N = 177$  participants for each of the 12 musical examples and the 2 retest examples.

| Stimulus             | Proportion of correct answers               |
|----------------------|---------------------------------------------|
|                      | (Hits/CRs for OA/KPA stimuli, respectively) |
| 1 (OA)               | 0.655                                       |
| 2 (KPA)              | 0.492                                       |
| 3 (OA)               | 0.463                                       |
| 4 (KPA)              | 0.638                                       |
| 5 (OA)               | 0.627                                       |
| 6 (KPA)              | 0.463                                       |
| 7 (OA)               | 0.492                                       |
| 8 (KPA)              | 0.588                                       |
| 9 (OA)               | 0.497                                       |
| Retest 9 = 13 (OA)   | 0.537                                       |
| 10 (KPA)             | 0.627                                       |
| 11 (OA)              | 0.424                                       |
| 12 (KPA)             | 0.774                                       |
| Retest 12 = 14 (KPA) | 0.757                                       |

Table S6: Descriptive statistics of the sensitivity of various sub-groups

|                                                                                              | Sensitivity $d'$ |      |        |       |
|----------------------------------------------------------------------------------------------|------------------|------|--------|-------|
|                                                                                              | $n$              | %    | $M$    | $SD$  |
| <b>Electric guitar expertise</b> (Do you play the electric guitar?)                          |                  |      |        |       |
| No                                                                                           | 19               | 10.7 | −0.017 | 0.756 |
| Yes, amateur                                                                                 | 50               | 28.2 | 0.401  | 0.809 |
| Yes, semi-professionally                                                                     | 60               | 33.9 | 0.381  | 0.760 |
| Yes, professionally                                                                          | 48               | 27.1 | 0.376  | 0.796 |
| <b>Knowledge of the KPA</b> (Did you know about the KPA before participating in this study?) |                  |      |        |       |
| No                                                                                           | 18               | 10.2 | 0.232  | 0.800 |
| Yes, but I have not worked with it                                                           | 69               | 39.0 | 0.281  | 0.772 |
| Yes, I have used it myself                                                                   | 90               | 50.8 | 0.411  | 0.798 |
| <b>Musical profession</b> (I am [or I am going to be] ...)                                   |                  |      |        |       |
| Non-musician                                                                                 | 6                | 3.4  | -0.144 | 0.445 |
| Amateur musician                                                                             | 65               | 36.7 | 0.325  | 0.730 |
| Teacher at a music school                                                                    | 16               | 9.0  | 0.602  | 0.908 |
| Music producer                                                                               | 24               | 13.6 | 0.429  | 0.756 |
| Professional musician                                                                        | 22               | 12.4 | 0.460  | 0.755 |
| Other musician                                                                               | 44               | 24.9 | 0.234  | 0.875 |

Table S7: Between-group differences concerning electric guitar expertise, knowledge of the KPA, and musical profession

| <b>Cases</b>              | <b><i>SS</i></b><br>(Type III) | <b><i>df</i></b> | <b><i>MS</i></b> | <b><i>F</i></b> | <b><i>p</i></b> | <b><math>\eta^2</math></b> |
|---------------------------|--------------------------------|------------------|------------------|-----------------|-----------------|----------------------------|
| Electric guitar expertise | 2.771                          | 3                | 0.924            | 1.504           | .215            | 0.025                      |
| Residual                  | 106.239                        | 173              | 0.614            |                 |                 |                            |
| Knowledge of the KPA      | 0.902                          | 2                | 0.451            | 0.726           | .485            | 0.008                      |
| Residual                  | 108.107                        | 174              | 0.621            |                 |                 |                            |
| Musical profession        | 3.516                          | 5                | 0.703            | 1.140           | .341            | 0.032                      |
| Residual                  | 105.494                        | 171              | 0.617            |                 |                 |                            |

Table S8: Analysis of the relation between sensitivity and independent variables using Bayes statistics. (Models under consideration: Null model = no effect of the variable; “*variable name*” = the variable has an effect;  $P(M)$  = prior model probabilities;  $P(M/data)$  updated probability after having observed the data;  $BF_M$  = degree to which the data have changed the prior model odds;  $BF_{01}$  = Bayes factor for each row-model against the null model; Error % = size of the error in the integration routine relative to the Bayes factor. Explanations have been taken from Wagenmakers et al. (2018, p. 68)).

| <b>Models under consideration</b> | <b><math>P(M)</math></b> | <b><math>P(M/data)</math></b> | <b><math>BF_M</math></b> | <b><math>BF_{01}</math></b> | <b>Error %</b> |
|-----------------------------------|--------------------------|-------------------------------|--------------------------|-----------------------------|----------------|
| Null model                        | .500                     | .866                          | 6.448                    | 1.000                       |                |
| Electric guitar expertise         | .500                     | .134                          | 0.155                    | 6.448                       | .001           |
| Null model                        | .500                     | .881                          | 7.391                    | 1.000                       |                |
| Knowledge of the KPA              | .500                     | .119                          | 0.135                    | 7.391                       | .025           |
| Null model                        | .500                     | .926                          | 12.435                   | 1.000                       |                |
| Musical profession                | .500                     | .074                          | 0.080                    | 12.345                      | .002           |

Table S9: Sensitivity in groups to different audio device quality

|                                            | <i>n</i> | <i>%</i> | Sensitivity <i>d'</i> |           | <i>t</i> -test                                                                             |
|--------------------------------------------|----------|----------|-----------------------|-----------|--------------------------------------------------------------------------------------------|
|                                            |          |          | <i>M</i>              | <i>SD</i> |                                                                                            |
| Lower cut-off frequency                    |          |          |                       |           |                                                                                            |
| ≤ 40 Hz                                    | 151      | 85.3     | 0.349                 | 0.813     | <i>t</i> (175) = 0.283, <i>p</i> = .777, Cohen's <i>d</i> = 0.060, 95% CI [-0.356, 0.476]  |
| > 40 Hz                                    | 26       | 14.7     | 0.302                 | 0.624     |                                                                                            |
| Headphones vs. loudspeakers                |          |          |                       |           |                                                                                            |
| Headphones                                 | 79       | 44.6     | 0.363                 | 0.845     | <i>t</i> (175) = 0.304, <i>p</i> = .761. Cohen's <i>d</i> = 0.046, 95% CI [-0.250, 0.342]  |
| Loudspeakers                               | 98       | 55.4     | 0.326                 | 0.741     |                                                                                            |
| Mode of playback                           |          |          |                       |           |                                                                                            |
| Stereophonic (correct or swapped polarity) | 163      | 92.1     | 0.334                 | 0.772     | <i>t</i> (175) = -0.466, <i>p</i> = .642, Cohens <i>d</i> = -0.130, 95% CI [-0.676, 0.416] |
| Monophonic or wrong answer                 | 14       | 7.9      | 0.437                 | 0.971     |                                                                                            |

Table S10: Values of psychoacoustic features entropy, inharmonicity, roughness, loudness, spectral flux (mean and median), and zero crossing rate for all pairs of stimuli including practice stimuli and relative and absolute differences between the stimulus pairs. Calculations for entropy, inharmonicity, spectral flux, and zero crossing rate are based on the MIRtoolbox V1.7.2 (Lartillot, Toivainen, & Eerola, 2008). Analyses of roughness and loudness were conducted by means of the software dBSONIC ("dBSONIC" 2012). For analysis parameters, see captions for Figure S10 and S11.

|                                                                | Entropy [0;<br>1] | Inharmonicity [0;<br>1] | Roughness [cA]<br>(mean) | Loudness [sone]<br>(mean) | Spectral flux<br>(mean) | Spectral flux<br>(median) | Zero crossing<br>rate (sum) |
|----------------------------------------------------------------|-------------------|-------------------------|--------------------------|---------------------------|-------------------------|---------------------------|-----------------------------|
| 1: OA                                                          | 0.788             | 0.391                   | 17.45                    | 13.45                     | 14.47                   | 9.404                     | 527.997                     |
| 2: KPA                                                         | 0.781             | 0.377                   | 19.76                    | 13.85                     | 15.518                  | 8.684                     | 418.048                     |
| Absolute difference                                            | 0.007             | 0.014                   | 2.31                     | 0.40                      | 1.048                   | 0.72                      | 109.949                     |
| Relative difference (smaller<br>value divided by larger value) | 0.991             | 0.964                   | 0.883                    | 0.971                     | 0.932                   | 0.923                     | 0.792                       |
| 3: OA                                                          | 0.843             | 0.494                   | 33.33                    | 27.40                     | 72.164                  | 60.742                    | 889.750                     |
| 4: KPA                                                         | 0.845             | 0.477                   | 36.35                    | 26.19                     | 63.223                  | 53.210                    | 910.567                     |
| Absolute difference                                            | 0.001             | 0.017                   | 3.02                     | 1.21                      | 8.941                   | 7.533                     | 20.817                      |
| Relative difference (smaller<br>value divided by larger value) | 0.998             | 0.967                   | 0.917                    | 0.956                     | 0.884                   | 0.876                     | 0.977                       |
| 5: OA                                                          | 0.834             | 0.494                   | 25.76                    | 21.64                     | 33.704                  | 26.032                    | 942.783                     |

|                                                                |       |       |       |       |        |        |          |
|----------------------------------------------------------------|-------|-------|-------|-------|--------|--------|----------|
| 6: KPA                                                         | 0.824 | 0.487 | 23.31 | 22.56 | 35.221 | 29.619 | 809.758  |
| Absolute difference                                            | 0.009 | 0.007 | 2.45  | 0.92  | 1.517  | 3.587  | 133.025  |
| Relative difference (smaller<br>value divided by larger value) | 0.989 | 0.987 | 0.904 | 0.959 | 0.957  | 0.879  | 0.859    |
| 7: OA                                                          | 0.837 | 0.471 | 24.55 | 25.71 | 35.886 | 32.768 | 1053.702 |
| 8: KPA                                                         | 0.833 | 0.442 | 23.06 | 24.69 | 35.956 | 34.815 | 1016.857 |
| Absolute difference                                            | 0.004 | 0.029 | 1.49  | 1.02  | 0.070  | 2.047  | 36.845   |
| Relative difference (smaller<br>value divided by larger value) | 0.995 | 0.939 | 0.939 | 0.960 | 0.998  | 0.941  | 0.965    |
| 9: OA                                                          | 0.830 | 0.484 | 22.20 | 14.37 | 26.357 | 12.142 | 817.577  |
| 10: KPA                                                        | 0.828 | 0.506 | 27.25 | 14.71 | 29.539 | 12.522 | 730.733  |
| Absolute difference                                            | 0.003 | 0.022 | 5.05  | 0.34  | 3.182  | 0.381  | 86.844   |
| Relative difference (smaller<br>value divided by larger value) | 0.997 | 0.956 | 0.815 | 0.977 | 0.892  | 0.970  | 0.894    |
| 11: OA                                                         | 0.855 | 0.482 | 24.56 | 23.30 | 64.604 | 59.803 | 1738.503 |
| 12: KPA                                                        | 0.858 | 0.500 | 24.86 | 23.13 | 63.465 | 63.929 | 1796.573 |
| Absolute difference                                            | 0.003 | 0.018 | 0.30  | 0.17  | 1.139  | 4.126  | 58.070   |
| Relative difference (smaller<br>value divided by larger value) | 0.996 | 0.964 | 0.988 | 0.993 | 0.982  | 0.935  | 0.968    |

|                                                                |       |       |       |       |        |        |          |
|----------------------------------------------------------------|-------|-------|-------|-------|--------|--------|----------|
| Practice stimulus 1: OA                                        | 0.826 | 0.496 | 40.38 | 57.74 | 81.422 | 80.875 | 1743.333 |
| Practice stimulus 2: KPA                                       | 0.834 | 0.484 | 48.43 | 57.50 | 90.556 | 85.755 | 1847.071 |
| Absolute difference                                            | 0.008 | 0.012 | 8.05  | 0.24  | 9.135  | 4.880  | 103.738  |
| Relative difference (smaller<br>value divided by larger value) | 0.990 | 0.975 | 0.834 | 0.996 | 0.899  | 0.943  | 0.944    |
| Practice stimulus 3: OA                                        | 0.777 | 0.427 | 39.44 | 58.47 | 24.117 | 18.652 | 704.651  |
| Practice stimulus 4: KPA                                       | 0.767 | 0.435 | 40.76 | 58.84 | 32.233 | 25.116 | 557.161  |
| Absolute difference                                            | 0.010 | 0.008 | 1.32  | 0.37  | 8.117  | 6.463  | 147.490  |
| Relative difference (smaller<br>value divided by larger value) | 0.987 | 0.981 | 0.968 | 0.994 | 0.748  | 0.743  | 0.791    |

Table S11: Descriptive statistics for the relative difference (smaller value divided by larger value) of psychoacoustic features across the experimental stimuli 1-12. Mean values close to 1.0 indicate a high degree of similarity between OA and KPA.

|                           | Entropy | Inharmonicity | Roughness | Loudness | Spectral Flux<br>(mean) | Spectral Flux<br>(median) | Zero crossing<br>rate |
|---------------------------|---------|---------------|-----------|----------|-------------------------|---------------------------|-----------------------|
| <b>Mean</b>               | 0.994   | 0.963         | 0.907     | 0.969    | 0.941                   | 0.921                     | 0.909                 |
| <b>Std. Error of Mean</b> | 0.001   | 0.006         | 0.024     | 0.006    | 0.019                   | 0.015                     | 0.030                 |
| <b>Median</b>             | 0.996   | 0.964         | 0.911     | 0.966    | 0.945                   | 0.929                     | 0.929                 |
| <b>Minimum</b>            | 0.989   | 0.939         | 0.815     | 0.955    | 0.884                   | 0.876                     | 0.792                 |
| <b>Maximum</b>            | 0.998   | 0.987         | 0.987     | 0.993    | 0.998                   | 0.970                     | 0.977                 |

## E: Endnote

- <sup>1</sup> Figure S10c and S11c reveal that Stimulus 5 (red line, OA) was significantly longer than the corresponding Stimulus 6 (green line, KPA). This was due to some accidental repetition of a short phrase in Stimulus 5: The two-bar pattern in the beginning was played four times in Stimulus 6 instead of three times as in Stimulus 5. Furthermore, the ending (rhythmic chords on the harmonic dominant) took not only two bars (as in Stimulus 6) but three bars (in Stimulus 5). However, no additional musical idea or material was presented in the longer stimulus. The inclusion of an additional repetition did not have an impact on the proportion of correct responses: The correct response rate for Stimulus 5 (62.7%) did not differ significantly from the overall correct response rate for OA stimuli ( $M = 52.6\%$ ,  $SD = 18.7\%$ ;  $z$ -test results in  $p = 70.5\%$ ; therefore, the probability of this difference being due to coincidence is very high). The correct response rate for Stimulus 6 (46.3%) did not differ significantly from the overall correct response rate for OA stimuli ( $M = 59.7\%$ ,  $SD = 18.3\%$ ;  $z$ -test results in  $p = 23.3\%$ , which was also above the significance threshold of 5%). Therefore, we can conclude that the accidental variation between the stimuli pairs did not have an effect on the participants' allocation of the stimuli to the response categories. Considering that participants could listen to each audio example as often as they wanted and could repeat parts of the stimulus ad libitum, it can be concluded that the additional repetition in one of the stimuli did not influence the participants' response behavior.

## F. References

- dBSONIC [computer software] (Version 4.501). (2012). Limonest, France: 01dB-Metravib.  
Retrieved from <http://www.01db-metravib.com>
- Lartillot, O., Toiviainen, P., & Eerola, T. (2008). A Matlab toolbox for music information retrieval. In C. Preisach, H. Burkhardt, L. Schmidt-Thieme, & R. Decker (Eds.), *Data analysis, machine learning and applications, studies in classification, data analysis, and knowledge organization* (pp. 261–268). Berlin, Heidelberg: Springer-Verlag.
- Schaal, N. K., Bauer, A.-K. R., & Müllensiefen, D. (2014). Der Gold-MSI: Replikation und Validierung eines Fragebogeninstrumentes zur Messung Musikalischer Erfahrungheit anhand einer deutschen Stichprobe. *Musicae Scientiae*, 18(4), 423–447. doi:10.1177/1029864914541851
- Wagenmakers, E.-J., Love, J., Marsman, M., Jamil, T., Ly, A., Verhagen, J., . . . Morey, R. D. (2018). Bayesian inference for psychology. Part II: Example applications with JASP. *Psychonomic bulletin & review*, 25(1), 58–76. doi:10.3758/s13423-017-1323-7
